# Supplementary material for: Discovery of Fungus-Specific Targets and Inhibitors Using Chemical Phenotyping of Pathogenic Spore Germination
Source: PubMed Central journal article supplement (PMC8406298; doi:10.1128/mbio.01672-21), 2021-07-27

| PubChem CID | Structure                                                                           | Control 0 Hours                                                                     | Control 12 Hours                                                                    | 80 $\mu$ M 0 Hours                                                                  | 80 $\mu$ M 12 Hours                                                                  | Germination Inhibitor | Compound Precipitation | Relative Level of Inhibition |
|-------------|-------------------------------------------------------------------------------------|-------------------------------------------------------------------------------------|-------------------------------------------------------------------------------------|-------------------------------------------------------------------------------------|--------------------------------------------------------------------------------------|-----------------------|------------------------|------------------------------|
| 17520       | 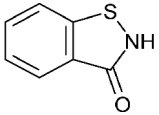   |    |    |    |    | Yes                   | No                     | Full                         |
| 27144       |    |    |    |    |    | Yes                   | No                     | Full                         |
| 27297       |    |    |    |    |    | Yes                   | No                     | Full                         |
| 66123       |    |    |    |    |    | Yes                   | No                     | Intermediate                 |
| 76937       |    |    |    |    |    | Yes                   | No                     | Full                         |
| 99741       |  |   |   |   |   | Yes                   | No                     | Intermediate                 |
| 121637      |  |  |  |  |  | Yes                   | No                     | Full                         |
| 243059      |  |  |  |  |  | Yes                   | No                     | Intermediate                 |
| 282938      |  |  |  |  |  | Yes                   | No                     | Full                         |
| 292929      |  |  |  |  |  | Yes                   | No                     | Full                         |

|        |                                                                                     |                                                                                     |                                                                                     |                                                                                     |                                                                                      |     |     |              |
|--------|-------------------------------------------------------------------------------------|-------------------------------------------------------------------------------------|-------------------------------------------------------------------------------------|-------------------------------------------------------------------------------------|--------------------------------------------------------------------------------------|-----|-----|--------------|
| 302279 | 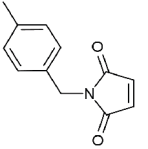   |    |    |    |    | Yes | No  | Full         |
| 310131 |    |    |    |    |    | Yes | Yes | Debris       |
| 652808 |    |    |    |    |    | Yes | No  | Intermediate |
| 673711 |    |    |    |    |    | Yes | No  | Intermediate |
| 688709 |    |    |    |    |    | Yes | No  | Full         |
| 697528 |   |   |   |   |   | Yes | No  | Intermediate |
| 700009 |  |  |  |  |  | Yes | No  | Full         |
| 700148 |  |  |  |  |  | Yes | Yes | Debris       |
| 700976 |  |  |  |  |  | Yes | No  | Intermediate |
| 701070 |  |  |  |  |  | Yes | No  | Full         |
| 707936 |  |  |  |  |  | Yes | No  | Full         |

|        |                                                                                     |                                                                                     |                                                                                     |                                                                                     |                                                                                      |     |     |              |
|--------|-------------------------------------------------------------------------------------|-------------------------------------------------------------------------------------|-------------------------------------------------------------------------------------|-------------------------------------------------------------------------------------|--------------------------------------------------------------------------------------|-----|-----|--------------|
| 709153 | 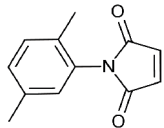   |    |    |    |    | Yes | No  | Full         |
| 717711 |    |    |    |    |    | Yes | Yes | Debris       |
| 723732 |    |    |    |    |    | Yes | No  | Intermediate |
| 731806 |    |    |    |    |    | Yes | No  | Intermediate |
| 733834 |    |    |    |    |    | Yes | No  | Intermediate |
| 749608 |   |   |   |   |   | Yes | No  | Full         |
| 766532 |  |  |  |  |  | Yes | Yes | Debris       |
| 767639 |  |  |  |  |  | Yes | No  | Full         |
| 768672 |  |  |  |  |  | Yes | Yes | Debris       |
| 773093 |  |  |  |  |  | Yes | No  | Full         |
| 780598 |  |  |  |  |  | Yes | Yes | Debris       |

|        |                                                                                     |                                                                                      |     |     |              |
|--------|-------------------------------------------------------------------------------------|--------------------------------------------------------------------------------------|-----|-----|--------------|
| 790960 | 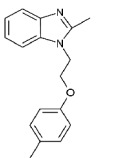   |    | Yes | No  | Intermediate |
| 803194 |    |    | Yes | No  | Full         |
| 820752 |    |    | Yes | Yes | Debris       |
| 852322 |    |    | Yes | No  | Full         |
| 874714 |    |    | Yes | No  | Full         |
| 889748 |   |   | Yes | Yes | Debris       |
| 899259 |  |  | Yes | No  | Intermediate |
| 944383 |  |  | Yes | No  | Full         |
| 955598 |  |  | Yes | Yes | Debris       |
| 957599 |  |  | Yes | No  | Full         |
| 962333 |  |  | Yes | No  | Intermediate |

|         |                                                                                     |                                                                                     |                                                                                     |                                                                                     |                                                                                      |     |     |              |
|---------|-------------------------------------------------------------------------------------|-------------------------------------------------------------------------------------|-------------------------------------------------------------------------------------|-------------------------------------------------------------------------------------|--------------------------------------------------------------------------------------|-----|-----|--------------|
| 973573  | 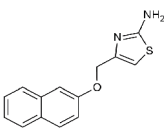   |    |    |    |    | Yes | No  | Full         |
| 983861  |    |    |    |    |    | Yes | No  | Full         |
| 1092459 |    |    |    |    |    | Yes | No  | Intermediate |
| 1186249 |    |    |    |    |    | Yes | Yes | Debris       |
| 1204290 |    |    |    |    |    | Yes | No  | Full         |
| 1307471 |   |   |   |   |   | Yes | No  | Intermediate |
| 1391595 |  |  |  |  |  | Yes | no  | Intermediate |
| 1475928 |  |  |  |  |  | Yes | Yes | Debris       |
| 1505880 |  |  |  |  |  | Yes | No  | Intermediate |
| 1570496 |  |  |  |  |  | Yes | Yes | Debris       |
| 1589778 |  |  |  |  |  | Yes | No  | Intermediate |

|         |  |                        |                         |                        |                         |     |     |              |
|---------|--|------------------------|-------------------------|------------------------|-------------------------|-----|-----|--------------|
| 1589789 |  |                        |                         |                        |                         | Yes | No  | Full         |
| 1636480 |  | Control 0 Hours        | Control 12 Hours        | SLM SMSF040449 0 Hours | SLM SMSF040449 12 Hours | Yes | No  | Full         |
| 1653621 |  | SLM SMSF040450 0 Hours | SLM SMSF040450 12 Hours | SLM SMSF040450 0 Hours | SLM SMSF040450 12 Hours | Yes | No  | Intermediate |
| 1653635 |  | SLM SMSF040458 0 Hours | SLM SMSF040458 12 Hours | SLM SMSF040458 0 Hours | SLM SMSF040458 12 Hours | Yes | No  | Intermediate |
| 1992009 |  | SLM SMSF040457 0 Hours | SLM SMSF040457 12 Hours | SLM SMSF040457 0 Hours | SLM SMSF040457 12 Hours | Yes | Yes | Debris       |
| 2008712 |  | SLM SMSF040460 0 Hours | SLM SMSF040460 12 Hours | SLM SMSF040460 0 Hours | SLM SMSF040460 12 Hours | Yes | No  | Full         |
| 2049334 |  | Control 0 Hours        | Control 12 Hours        | SLM SMSF041229 0 Hours | SLM SMSF041229 12 Hours | Yes | No  | Full         |
| 2049855 |  | SLM SMSF044276 0 Hours | SLM SMSF044276 12 Hours | SLM SMSF044276 0 Hours | SLM SMSF044276 12 Hours | Yes | No  | Intermediate |
| 2129690 |  | SLM SMSF041198 0 Hours | SLM SMSF041198 12 Hours | SLM SMSF041198 0 Hours | SLM SMSF041198 12 Hours | Yes | No  | Intermediate |
| 2133779 |  | SLM SMSF041482 0 Hours | SLM SMSF041482 12 Hours | SLM SMSF041482 0 Hours | SLM SMSF041482 12 Hours | Yes | No  | Full         |
| 2139195 |  | Control 0 Hours        | Control 12 Hours        | SLM SMSF040464 0 Hours | SLM SMSF040464 12 Hours | Yes | No  | Full         |

|         |                                                                                     |                                                                                     |                                                                                     |                                                                                     |                                                                                      |     |     |              |
|---------|-------------------------------------------------------------------------------------|-------------------------------------------------------------------------------------|-------------------------------------------------------------------------------------|-------------------------------------------------------------------------------------|--------------------------------------------------------------------------------------|-----|-----|--------------|
| 2238990 | 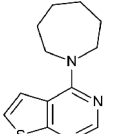   |    |    |    |    | Yes | No  | Full         |
| 2238992 |    |    |    |    |    | Yes | No  | Full         |
| 2238994 |    |    |    |    |    | Yes | No  | Full         |
| 2239015 |    |    |    |    |    | Yes | No  | Full         |
| 2354424 |    |    |    |    |    | Yes | Yes | Debris       |
| 2497352 |   |   |   |   |   | Yes | Yes | Debris       |
| 2769740 |  |  |  |  |  | Yes | No  | Intermediate |
| 2771030 |  |  |  |  |  | Yes | No  | Intermediate |
| 2793380 |  |  |  |  |  | Yes | No  | Full         |
| 2831154 |  |  |  |  |  | Yes | no  | Intermediate |
| 2834581 |  |  |  |  |  | Yes | No  | Full         |

|         |  |  |  |  |  |     |     |              |
|---------|--|--|--|--|--|-----|-----|--------------|
| 2919713 |  |  |  |  |  | Yes | No  | Full         |
| 2936975 |  |  |  |  |  | Yes | No  | Intermediate |
| 2943193 |  |  |  |  |  | Yes | Yes | Debris       |
| 2954695 |  |  |  |  |  | Yes | No  | Full         |
| 2974037 |  |  |  |  |  | Yes | No  | Full         |
| 2981975 |  |  |  |  |  | Yes | No  | Intermediate |
| 2992099 |  |  |  |  |  | Yes | No  | Intermediate |
| 3090522 |  |  |  |  |  | Yes | No  | Full         |
| 3163780 |  |  |  |  |  | Yes | Yes | Debris       |
| 3242906 |  |  |  |  |  | Yes | No  | Full         |
| 3287596 |  |  |  |  |  | Yes | Yes | Debris       |



|         |                                                                                     |                                                                                     |                                                                                     |                                                                                     |                                                                                      |     |     |              |
|---------|-------------------------------------------------------------------------------------|-------------------------------------------------------------------------------------|-------------------------------------------------------------------------------------|-------------------------------------------------------------------------------------|--------------------------------------------------------------------------------------|-----|-----|--------------|
| 3377203 | 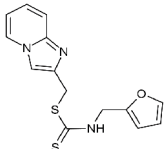   |    |    |    |    | Yes | No  | Intermediate |
| 3397555 |    |    |    |    |    | Yes | No  | Full         |
| 3516311 |    |    |    |    |    | Yes | No  | Full         |
| 3521356 |    |    |    |    |    | Yes | No  | Intermediate |
| 3624343 |    |    |    |    |    | Yes | No  | Full         |
| 3797566 |   |   |   |   |   | Yes | No  | Intermediate |
| 4081132 |  |  |  |  |  | Yes | No  | Intermediate |
| 4086498 |  |  |  |  |  | Yes | Yes | Intermediate |
| 4102712 |  |  |  |  |  | Yes | Yes | Debris       |
| 4111118 |  |  |  |  |  | Yes | No  | Full         |
| 4162926 |  |  |  |  |  | Yes | No  | Full         |

|         |                                                                                     |                                                                                     |                                                                                     |                                                                                     |                                                                                      |     |     |              |
|---------|-------------------------------------------------------------------------------------|-------------------------------------------------------------------------------------|-------------------------------------------------------------------------------------|-------------------------------------------------------------------------------------|--------------------------------------------------------------------------------------|-----|-----|--------------|
| 4169124 | 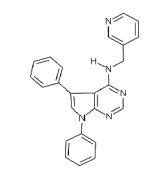   |    |    |    |    | Yes | No  | Intermediate |
| 4199189 |    |    |    |    |    | Yes | No  | Full         |
| 4345313 |    |    |    |    |    | Yes | No  | Full         |
| 4360162 |    |    |    |    |    | Yes | No  | Full         |
| 4413055 |    |    |    |    |    | Yes | No  | Intermediate |
| 4458495 |   |   |   |   |   | Yes | No  | Full         |
| 4684724 |  |  |  |  |  | Yes | No  | Full         |
| 4690650 |  |  |  |  |  | Yes | Yes | Debris       |
| 4714160 |  |  |  |  |  | Yes | No  | Full         |
| 4736829 |  |  |  |  |  | Yes | No  | Intermediate |
| 4737365 |  |  |  |  |  | Yes | No  | Intermediate |

|         |                                                                                     |                                                                                     |                                                                                     |                                                                                     |                                                                                      |     |     |              |
|---------|-------------------------------------------------------------------------------------|-------------------------------------------------------------------------------------|-------------------------------------------------------------------------------------|-------------------------------------------------------------------------------------|--------------------------------------------------------------------------------------|-----|-----|--------------|
| 4913014 | 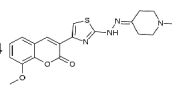   |    |    |    |    | Yes | No  | Intermediate |
| 5351098 |    |    |    |    |    | Yes | No  | Full         |
| 5769808 |    |    |    |    |    | Yes | No  | Intermediate |
| 5769972 |    |    |    |    |    | Yes | No  | Full         |
| 5991625 |    |    |    |    |    | Yes | No  | Full         |
| 6104220 |  |   |   |   |   | Yes | No  | Full         |
| 6263817 |  |  |  |  |  | Yes | No  | Full         |
| 7119035 |  |  |  |  |  | Yes | Yes | Debris       |
| 7120750 |  |  |  |  |  | Yes | Yes | Debris       |
| 7167022 |  |  |  |  |  | Yes | No  | Full         |
| 7178481 |  |  |  |  |  | Yes | Yes | Debris       |

|          |  |  |  |  |  |     |     |              |
|----------|--|--|--|--|--|-----|-----|--------------|
| 7185492  |  |  |  |  |  | Yes | No  | Full         |
| 7185494  |  |  |  |  |  | Yes | Yes | Full         |
| 7202929  |  |  |  |  |  | Yes | No  | Full         |
| 7294823  |  |  |  |  |  | Yes | No  | Intermediate |
| 7456205  |  |  |  |  |  | Yes | No  | Full         |
| 7471335  |  |  |  |  |  | Yes | No  | Full         |
| 7503016  |  |  |  |  |  | Yes | Yes | Debris       |
| 8720355  |  |  |  |  |  | Yes | No  | Full         |
| 8839503  |  |  |  |  |  | Yes | No  | Intermediate |
| 16032794 |  |  |  |  |  | Yes | No  | Intermediate |
| 16187117 |  |  |  |  |  | Yes | No  | Full         |

|          |                                                                                     |                                                                                     |                                                                                     |                                                                                     |                                                                                      |     |    |              |
|----------|-------------------------------------------------------------------------------------|-------------------------------------------------------------------------------------|-------------------------------------------------------------------------------------|-------------------------------------------------------------------------------------|--------------------------------------------------------------------------------------|-----|----|--------------|
| 16433415 | 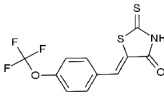   |    |    |    |    | Yes | No | Full         |
| 16456321 |    |    |    |    |    | Yes | No | Intermediate |
| 16456368 |    |    |    |    |    | Yes | No | Full         |
| 16456942 |    |    |    |    |    | Yes | No | Full         |
| 16823609 |    |    |    |    |    | Yes | No | Full         |
| 16876071 |   |   |   |   |   | Yes | No | Intermediate |
| 16883840 |  |  |  |  |  | Yes | No | Intermediate |
| 16934160 |  |  |  |  |  | Yes | No | Full         |
| 16934170 |  |  |  |  |  | Yes | No | Intermediate |
| 16942479 |  |  |  |  |  | Yes | No | Intermediate |
| 16951979 |  |  |  |  |  | Yes | No | Intermediate |

|          |                                                                                     |                                                                                      |     |     |              |
|----------|-------------------------------------------------------------------------------------|--------------------------------------------------------------------------------------|-----|-----|--------------|
| 16955786 | 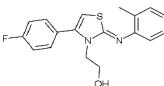   |    | Yes | No  | Intermediate |
| 17016619 |    |    | Yes | No  | Full         |
| 18558862 |    |    | Yes | Yes | Debris       |
| 18585549 |    |    | Yes | Yes | Intermediate |
| 18585630 |    |    | Yes | No  | Intermediate |
| 25835862 |   |   | Yes | No  | Intermediate |
| 27373469 |  |  | Yes | Yes | Debris       |
| 27373907 |  |  | Yes | No  | Intermediate |
| 27375613 |  |  | Yes | No  | Intermediate |
| 27460748 |  |  | Yes | No  | Intermediate |
| 30860168 |  |  | Yes | No  | Full         |

|          |                                                                                     |                                                                                      |     |     |              |
|----------|-------------------------------------------------------------------------------------|--------------------------------------------------------------------------------------|-----|-----|--------------|
| 30865811 | 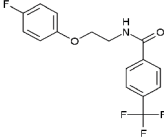   |    | Yes | No  | Full         |
| 42065409 |    |    | Yes | Yes | Debris       |
| 42099839 |    |    | Yes | No  | Full         |
| 42589452 |    |    | Yes | No  | Full         |
| 43842355 |    |    | Yes | No  | Intermediate |
| 44116743 |   |   | Yes | No  | Full         |
| 49722107 |  |  | Yes | No  | Intermediate |
| 71781394 |  |  | Yes | No  | Full         |
| 71782913 |  |  | Yes | No  | Full         |
| 71786870 |  |  | Yes | Yes | Debris       |
| 71786876 |  |  | Yes | No  | Intermediate |

|          |  |  |  |  |  |     |     |              |
|----------|--|--|--|--|--|-----|-----|--------------|
| 71786877 |  |  |  |  |  | Yes | No  | Intermediate |
| 71786985 |  |  |  |  |  | Yes | No  | Intermediate |
| 71786990 |  |  |  |  |  | Yes | Yes | Debris       |
| 71787916 |  |  |  |  |  | Yes | No  | Intermediate |
| 71788301 |  |  |  |  |  | Yes | No  | Intermediate |
| 71796286 |  |  |  |  |  | Yes | Yes | Debris       |
| 71797038 |  |  |  |  |  | Yes | No  | Full         |
| 71797126 |  |  |  |  |  | Yes | No  | Intermediate |
| 71798856 |  |  |  |  |  | Yes | No  | Full         |
| 71799766 |  |  |  |  |  | Yes | No  | Full         |
| 71801965 |  |  |  |  |  | Yes | Yes | Debris       |



|          |  |  |  |  |  |     |     |              |
|----------|--|--|--|--|--|-----|-----|--------------|
| 71802096 |  |  |  |  |  | Yes | No  | Full         |
| 71803023 |  |  |  |  |  | Yes | Yes | Debris       |
| 71803055 |  |  |  |  |  | Yes | Yes | Debris       |
| 71804107 |  |  |  |  |  | Yes | Yes | Debris       |
| 71807060 |  |  |  |  |  | Yes | Yes | Debris       |
| 71807075 |  |  |  |  |  | Yes | Yes | Debris       |
| 71811049 |  |  |  |  |  | Yes | Yes | Debris       |
| 72718563 |  |  |  |  |  | Yes | No  | Full         |
| 72720194 |  |  |  |  |  | Yes | No  | Full         |
| 76149097 |  |  |  |  |  | Yes | No  | Intermediate |
| 76150259 |  |  |  |  |  | Yes | No  | Intermediate |

|          |  |  |  |  |  |     |     |              |
|----------|--|--|--|--|--|-----|-----|--------------|
| 76150266 |  |  |  |  |  | Yes | No  | Intermediate |
| 91626508 |  |  |  |  |  | Yes | No  | Full         |
| 91628556 |  |  |  |  |  | Yes | No  | Full         |
| 91629266 |  |  |  |  |  | Yes | No  | Full         |
| 91630328 |  |  |  |  |  | Yes | Yes | Debris       |
| 763894   |  |  |  |  |  | No  | No  | No           |
| 1190482  |  |  |  |  |  | No  | Yes | No           |
| 1263311  |  |  |  |  |  | No  | No  | No           |
| 1528700  |  |  |  |  |  | No  | No  | No           |
| 1713451  |  |  |  |  |  | No  | No  | No           |
| 2200363  |  |  |  |  |  | No  | No  | No           |

|          |  |  |  |  |  |    |     |    |
|----------|--|--|--|--|--|----|-----|----|
| 2896856  |  |  |  |  |  | No | No  | No |
| 2951953  |  |  |  |  |  | No | No  | No |
| 3355288  |  |  |  |  |  | No | No  | No |
| 3629287  |  |  |  |  |  | No | No  | No |
| 4471873  |  |  |  |  |  | No | No  | No |
| 4754109  |  |  |  |  |  | No | No  | No |
| 4893324  |  |  |  |  |  | No | No  | No |
| 5639066  |  |  |  |  |  | No | No  | No |
| 7086348  |  |  |  |  |  | No | No  | No |
| 16010290 |  |  |  |  |  | No | No  | No |
| 16801811 |  |  |  |  |  | No | Yes | No |

|          |                                                                                     |                                                                                     |                                                                                     |                                                                                     |                                                                                      |    |     |    |
|----------|-------------------------------------------------------------------------------------|-------------------------------------------------------------------------------------|-------------------------------------------------------------------------------------|-------------------------------------------------------------------------------------|--------------------------------------------------------------------------------------|----|-----|----|
| 16804490 | 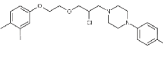   |    |    |    |    | No | No  | No |
| 16805904 |    |    |    |    |    | No | No  | No |
| 16824016 |    |    |    |    |    | No | No  | No |
| 16934153 |    |    |    |    |    | No | No  | No |
| 16951905 |    |    |    |    |    | No | No  | No |
| 18576765 |   |   |   |   |   | No | No  | No |
| 20896311 |  |  |  |  |  | No | Yes | No |
| 24280258 |  |  |  |  |  | No | No  | No |
| 25283140 |  |  |  |  |  | No | No  | No |
| 25283686 |  |  |  |  |  | No | No  | No |
| 25667819 |  |  |  |  |  | No | No  | No |

|          |  |  |  |  |  |    |    |    |
|----------|--|--|--|--|--|----|----|----|
| 25813521 |  |  |  |  |  | No | No | No |
| 42268033 |  |  |  |  |  | No | No | No |
| 43967671 |  |  |  |  |  | No | No | No |
| 44070699 |  |  |  |  |  | No | No | No |
| 44117349 |  |  |  |  |  | No | No | No |
| 44117394 |  |  |  |  |  | No | No | No |
| 45283772 |  |  |  |  |  | No | No | No |
| 46074589 |  |  |  |  |  | No | No | No |
| 49671361 |  |  |  |  |  | No | No | No |
| 49701731 |  |  |  |  |  | No | No | No |
| 49701828 |  |  |  |  |  | No | No | No |

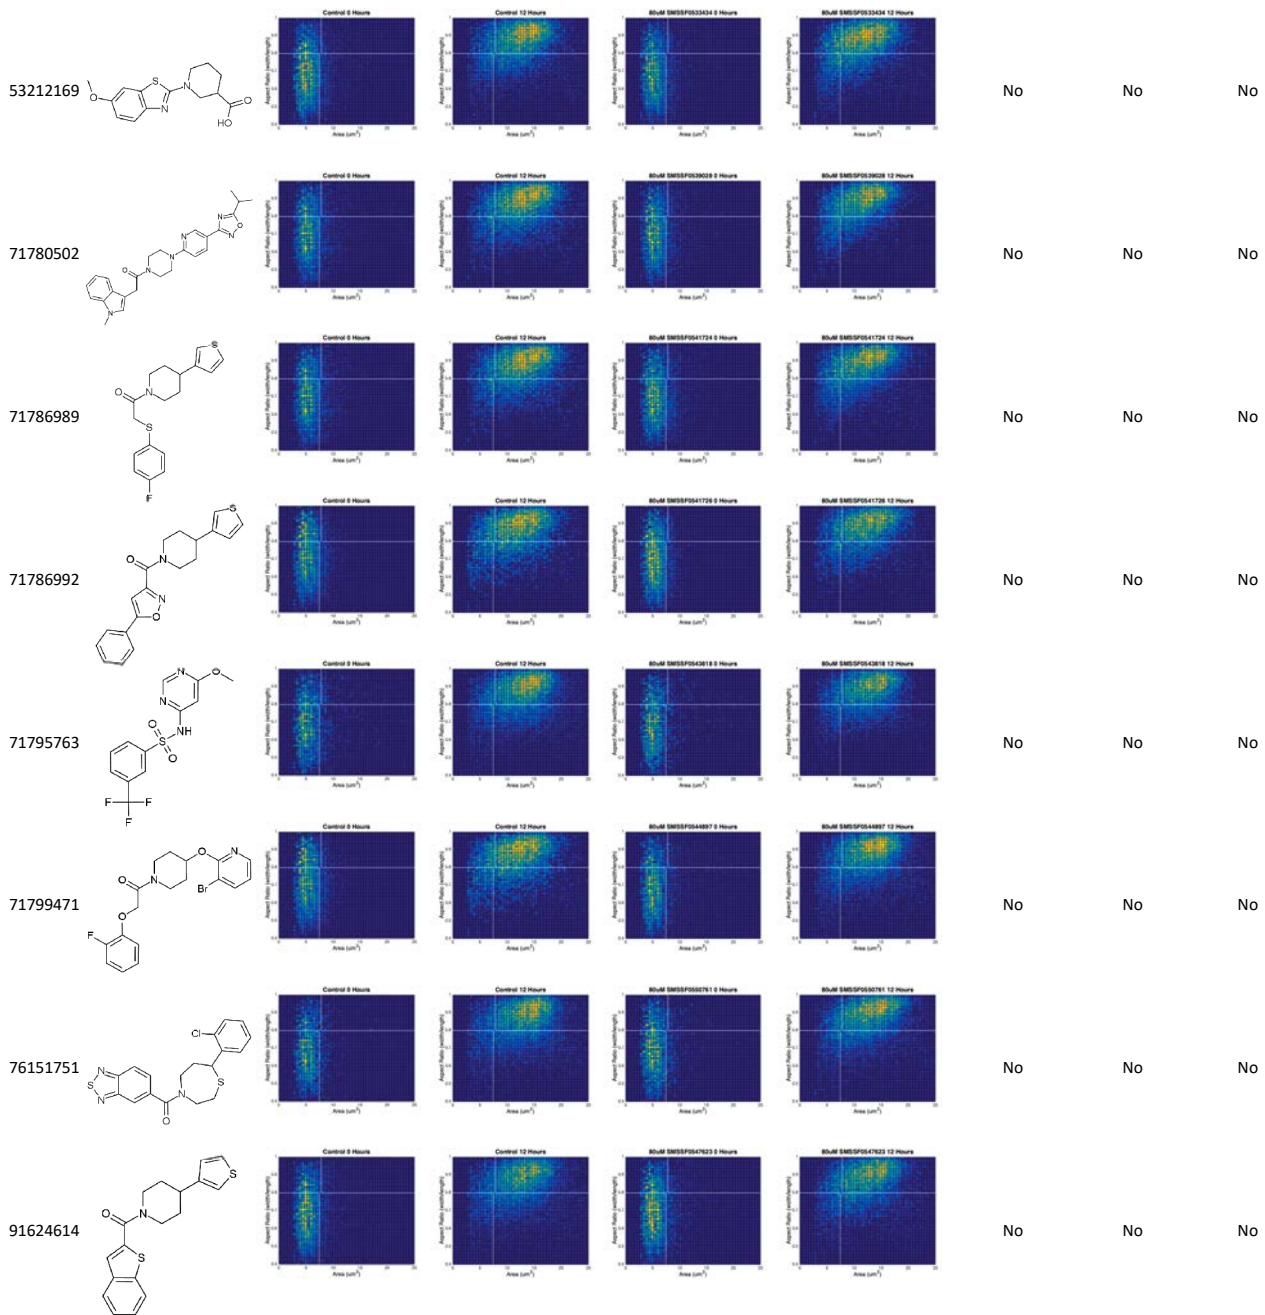

Supplement: mbio.01672-21-sd002.pdf [file mbio.01672-21-sd002.pdf]
