# Supplementary material for: Discovery of Fungus-Specific Targets and Inhibitors Using Chemical Phenotyping of Pathogenic Spore Germination
Source: PubMed Central journal article supplement (PMC8406298; doi:10.1128/mbio.01672-21), 2021-07-27
Supplement: mbio.01672-21-sf002.pdf [file mbio.01672-21-sf002.pdf]

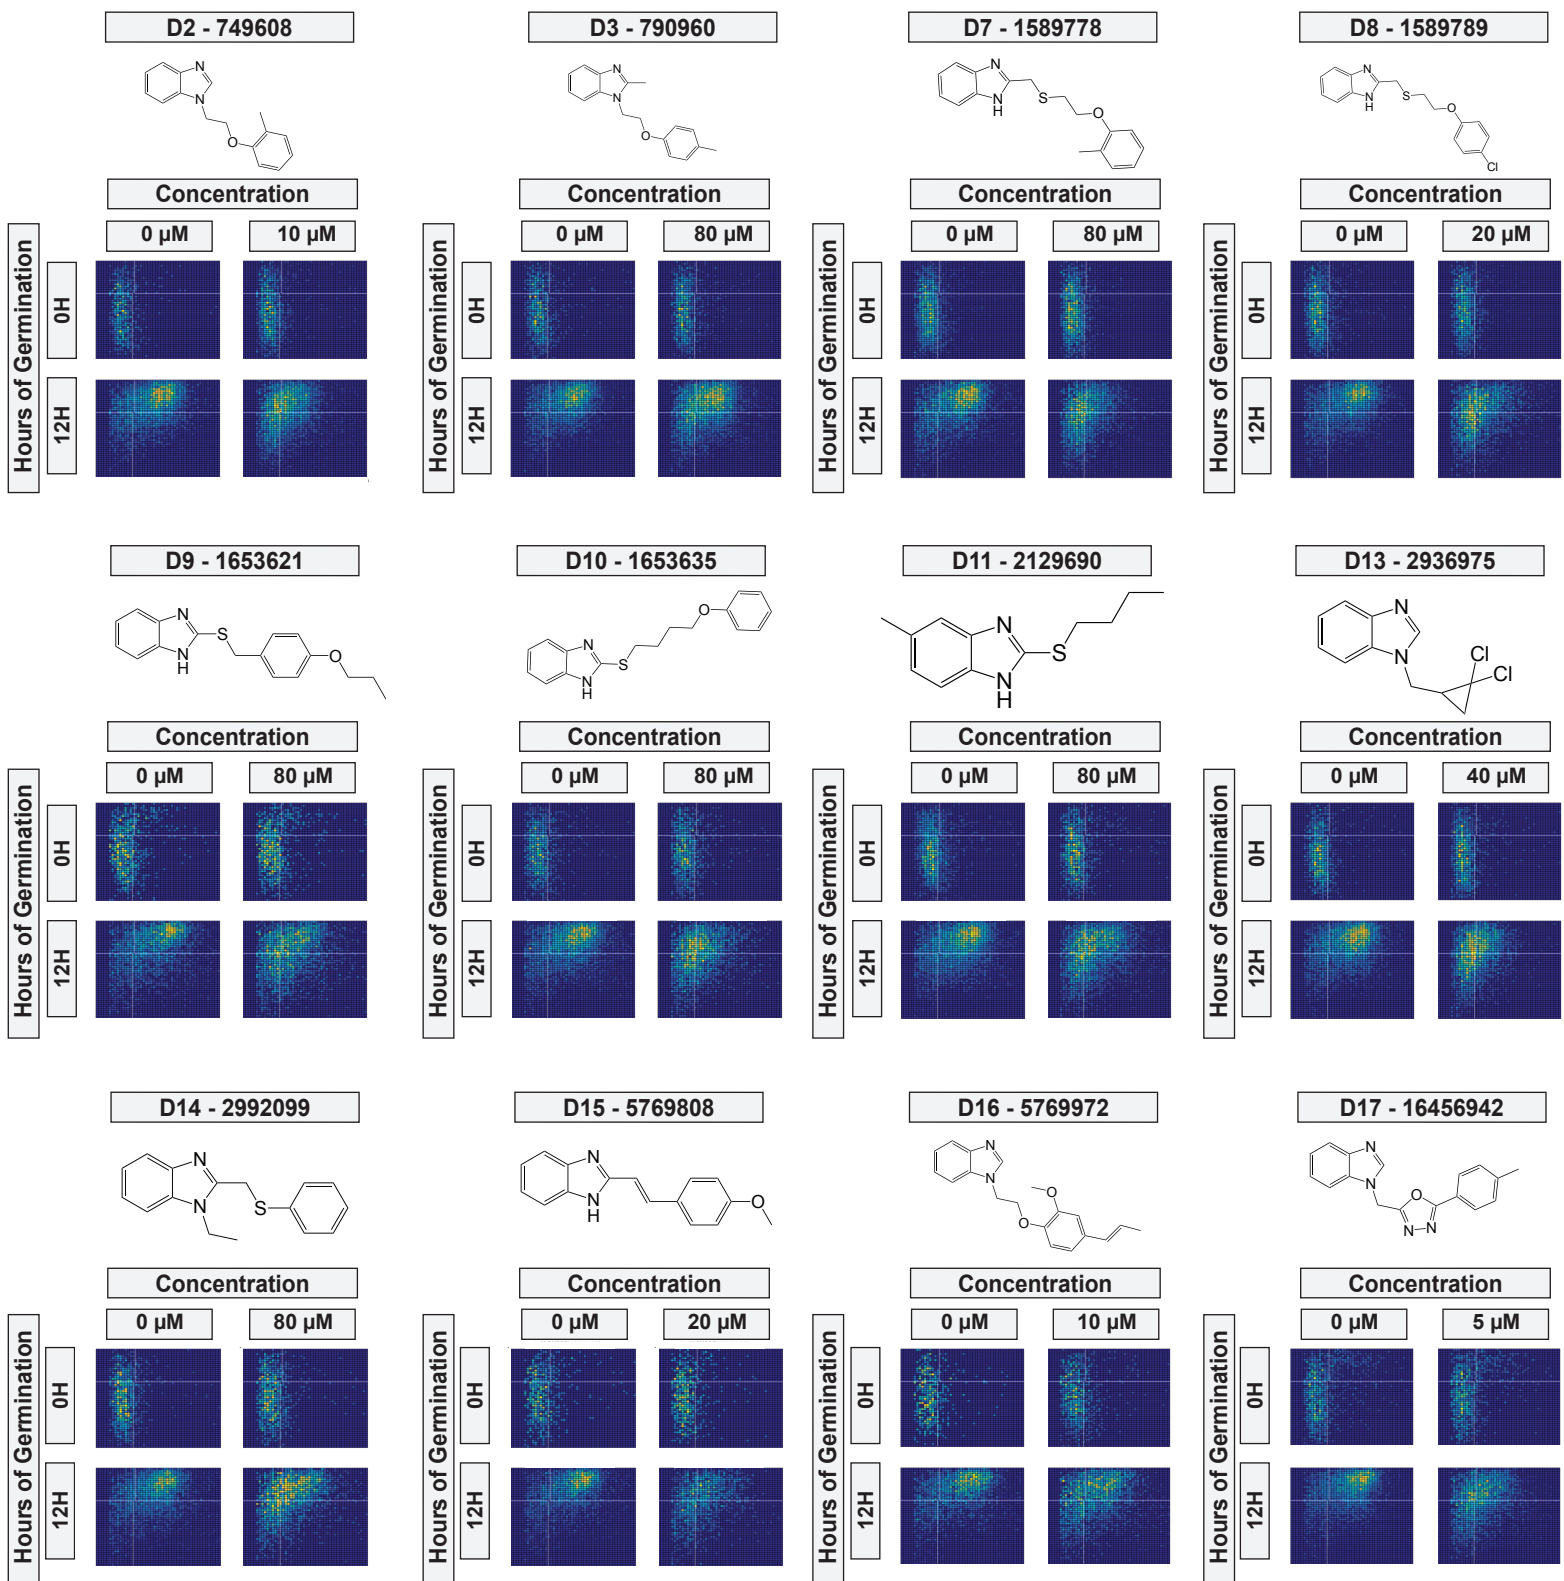

**Figure S2.** All Group D compounds tested caused a “slow down” phenotype. Representative 2-dimensional histograms of ~6,000 spores at phenotypic concentrations of randomly chosen Group D inhibitors.
