# Supplementary material for: Discovery of Fungus-Specific Targets and Inhibitors Using Chemical Phenotyping of Pathogenic Spore Germination
Source: PubMed Central journal article supplement (PMC8406298; doi:10.1128/mbio.01672-21), 2021-07-27
Supplement: mbio.01672-21-sf003.pdf [file mbio.01672-21-sf003.pdf]

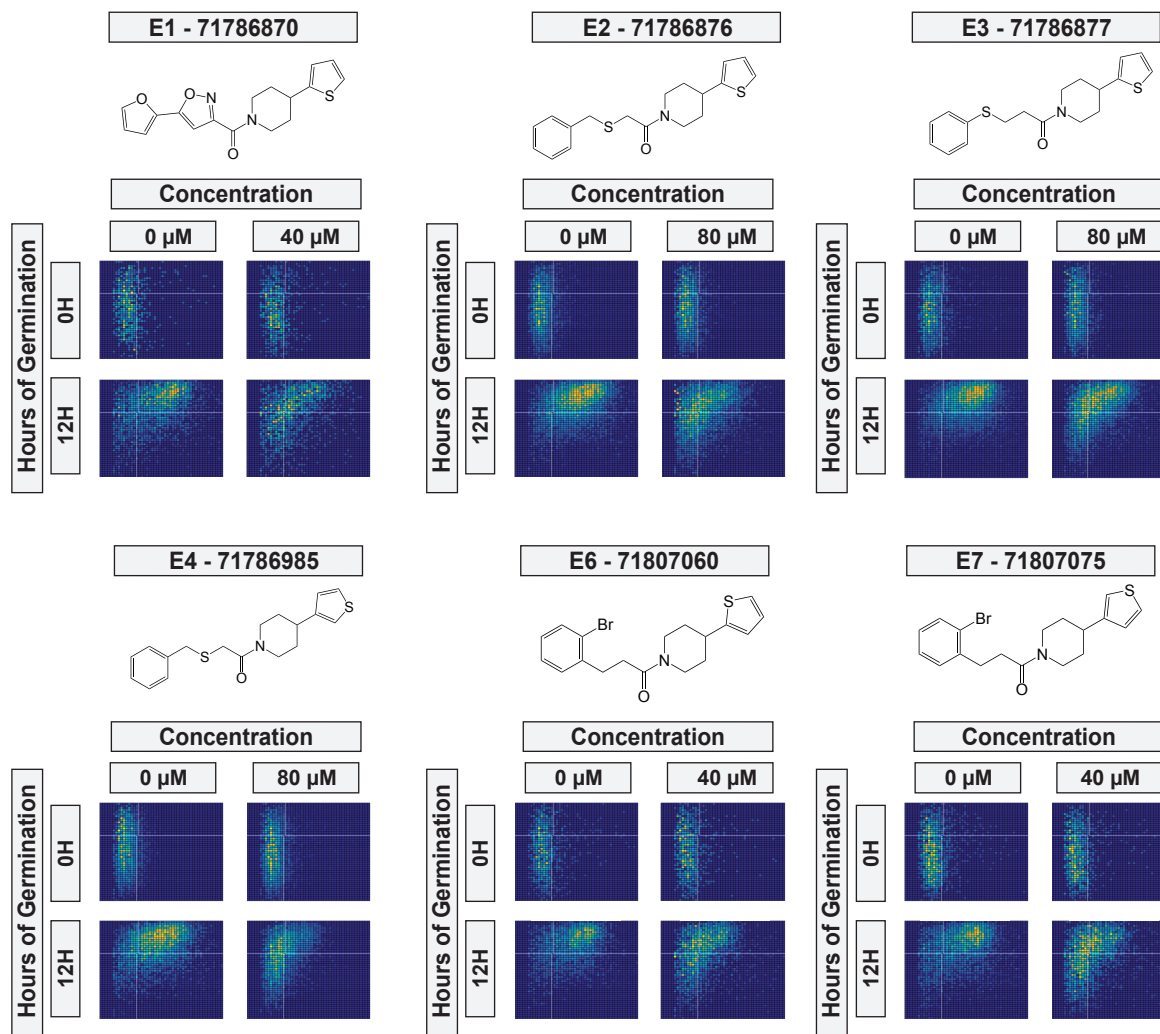

**Figure S3. All Group E compounds tested caused an “asynchrony” phenotype.** Representative 2-dimensional histograms of ~6,000 spores at phenotypic concentrations of randomly chosen Group E inhibitors.
