# Supplementary material for: Discovery of Fungus-Specific Targets and Inhibitors Using Chemical Phenotyping of Pathogenic Spore Germination
Source: PubMed Central journal article supplement (PMC8406298; doi:10.1128/mbio.01672-21), 2021-07-27
Supplement: mbio.01672-21-sf004.pdf [file mbio.01672-21-sf004.pdf]

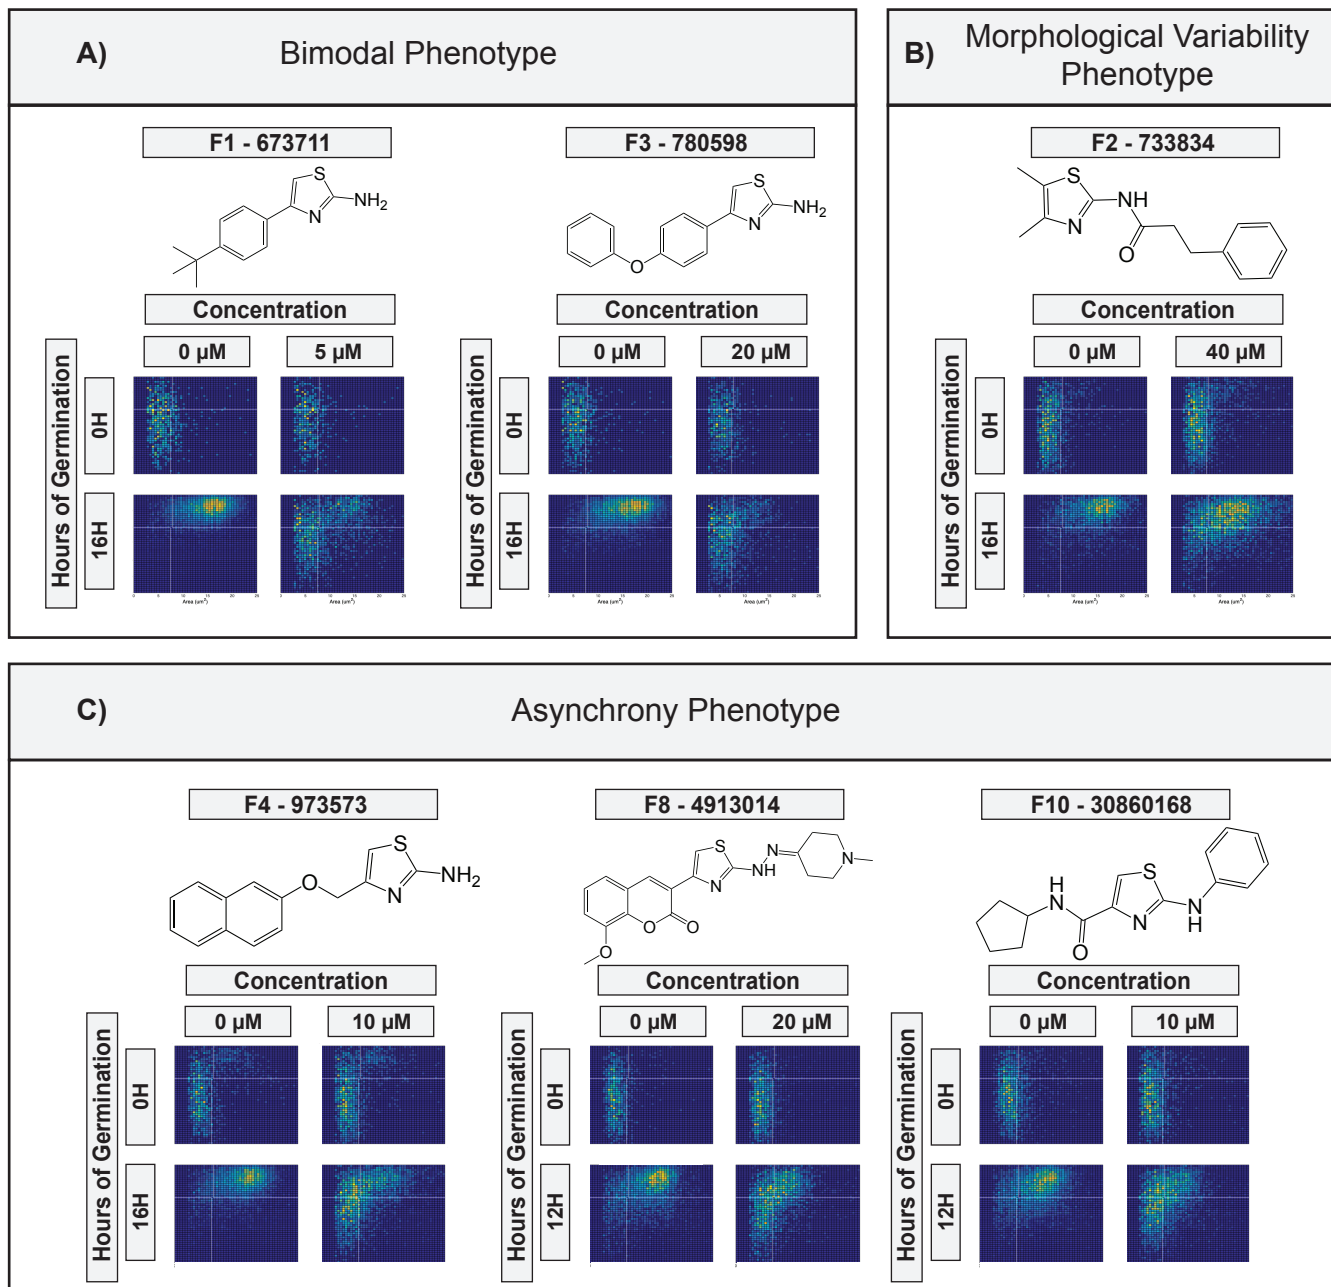

**Figure S4. Group F compounds caused three germination inhibition phenotypes.** Representative 2-dimensional histograms at phenotypic concentrations of randomly chosen Group F inhibitors.

A) F1 and F3 induced a “bimodal” phenotype. B) F2 induced a “morphological variability” phenotype.

C) F4, F8, and F10 each induced an “asynchrony” phenotype.
