# Supplementary material for: Discovery of Fungus-Specific Targets and Inhibitors Using Chemical Phenotyping of Pathogenic Spore Germination
Source: PubMed Central journal article supplement (PMC8406298; doi:10.1128/mbio.01672-21), 2021-07-27
Supplement: mbio.01672-21-sf005.pdf [file mbio.01672-21-sf005.pdf]

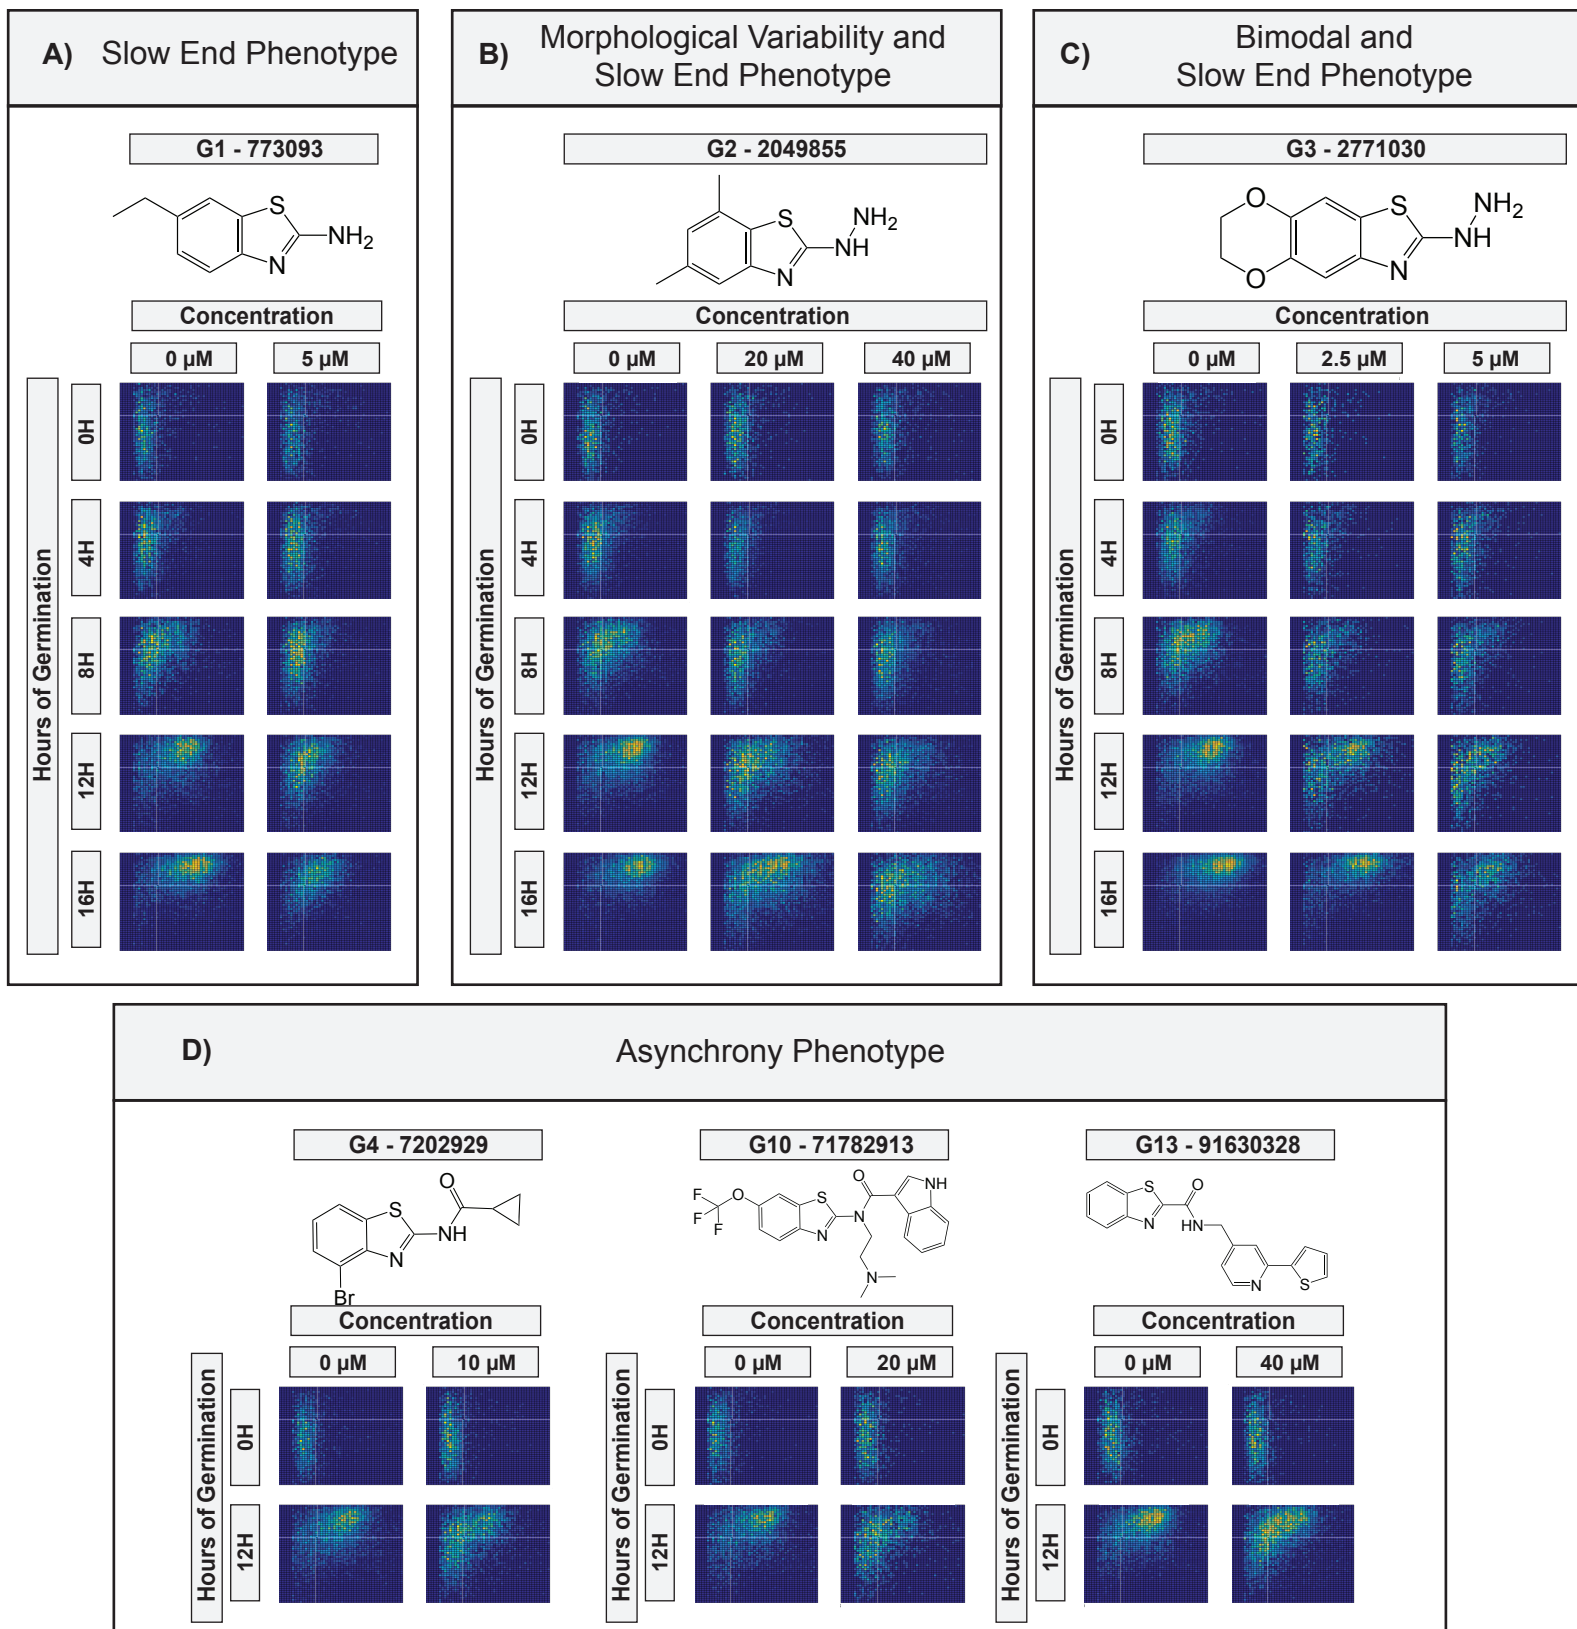

**Figure S5. Group G compounds caused 4 germination inhibition phenotypes.** Representative 2-dimensional histograms at phenotypic concentrations of randomly chosen Group G inhibitors. A) G1 induced a “slow end” phenotype. B) G2 induced a combination of the “morphological variability” and the “slow end” phenotypes. C) G3 induced a bimodal phenotype (at 2.5  $\mu$ M) followed by a combination phenotype of “bimodal” and “slow end” at higher concentrations (5  $\mu$ M). D) G4, G10, and G13 each induced an “asynchrony” phenotype.
